# Supplementary material for: Highly Conserved Testicular Localization of Claudin-11 in Normal and Impaired Spermatogenesis
Source: PubMed Central journal article supplement (PMC4972306; doi:10.1371/journal.pone.0160349), 2016-08-03
Supplement: pone.0160349.s002.pdf [file pone.0160349.s002.pdf]

S1 Table. Patients of the study: diagnosis, age, score and claudin-11 patches, the total number of patches in one tubular cross section (pat) and the number of patches in contact with the basal membrane (b pat).

| NSP    | age   | score | pat | b pat | ratio | pat | b pat | ratio | pat | b pat | ratio | pat | b pat | ratio | pat  | b pat | ratio | pat  | b pat | ratio | pat  | b pat | ratio | pat  | b pat | ratio | mean pat | mean b pat | mean ratio | SEM   |       |
|--------|-------|-------|-----|-------|-------|-----|-------|-------|-----|-------|-------|-----|-------|-------|------|-------|-------|------|-------|-------|------|-------|-------|------|-------|-------|----------|------------|------------|-------|-------|
| 41     | 9     |       | 9   | 3     | 33    | 17  | 6     | 35    | 13  | 8     | 62    | 15  | 9     | 60    | 25   | 11    | 44    | 11   | 6     | 55    | 16   | 9     | 56    | 13   | 7     | 54    | 14.88    | 7.38       | 49.85      | 3.867 |       |
| 43     | 10    |       | 7   | 1     | 14    | 10  | 5     | 50    | 16  | 8     | 50    | 17  | 7     | 41    | 20   | 6     | 30    | 20   | 12    | 60    | 16   | 7     | 44    | 18   | 5     | 28    | 15.50    | 6.38       | 39.62      | 5.218 |       |
| 37     | 10    |       | 12  | 6     | 50    | 16  | 7     | 44    | 21  | 12    | 57    | 26  | 12    | 46    | 6    | 1     | 17    | 25   | 12    | 48    | 12   | 5     | 42    | 17   | 6     | 35    | 16.88    | 7.63       | 42.33      | 4.300 |       |
| 32     | 10    |       | 21  | 13    | 62    | 25  | 18    | 72    | 25  | 16    | 64    | 21  | 11    | 52    | 30   | 20    | 67    | 31   | 14    | 45    | 25   | 17    | 68    | 26   | 12    | 46    | 25.50    | 15.13      | 59.53      | 3.636 |       |
| 33     | 10    |       | 14  | 7     | 50    | 20  | 7     | 35    | 16  | 7     | 44    | 12  | 7     | 58    | 19   | 9     | 47    | 12   | 4     | 33    | 20   | 8     | 40    | 13   | 5     | 38    | 15.75    | 6.75       | 43.28      | 2.959 |       |
| 39     | 10    |       | 24  | 14    | 58    | 29  | 14    | 48    | 23  | 9     | 39    | 36  | 19    | 53    | 27   | 11    | 41    | 22   | 11    | 50    | n.d. | n.d.  | n.d.  | n.d. | n.d.  | n.d.  | 26.83    | 13.00      | 48.21      | 2.971 |       |
| 35     | 10    |       | 19  | 6     | 32    | 21  | 9     | 43    | 25  | 8     | 32    | 17  | 9     | 53    | 18   | 10    | 56    | 20   | 10    | 50    | 16   | 5     | 31    | 14   | 2     | 14    | 18.75    | 7.38       | 38.81      | 4.962 |       |
| 47     | 10    |       | 14  | 3     | 21    | 17  | 10    | 59    | 25  | 9     | 36    | 32  | 20    | 63    | 19   | 10    | 53    | 17   | 8     | 47    | 20   | 8     | 40    | 11   | 2     | 18    | 19.38    | 8.75       | 42.08      | 5.782 |       |
| 43     | 10    |       | 10  | 4     | 40    | 14  | 3     | 21    | 12  | 4     | 33    | 23  | 12    | 52    | 13   | 3     | 23    | 22   | 9     | 41    | 22   | 15    | 68    | 20   | 8     | 40    | 17.00    | 7.25       | 39.89      | 5.377 |       |
| 37     | 10    |       | 22  | 9     | 41    | 16  | 5     | 31    | 15  | 3     | 20    | 12  | 4     | 33    | 24   | 7     | 29    | 9    | 4     | 44    | 14   | 4     | 29    | 17   | 6     | 35    | 16.13    | 5.25       | 32.87      | 2.690 |       |
| 20     | 10    |       | 20  | 10    | 50    | 11  | 1     | 9     | 21  | 9     | 43    | 23  | 11    | 48    | n.d. | n.d.  | n.d.  | n.d. | n.d.  | n.d.  | n.d. | n.d.  | n.d.  | n.d. | n.d.  | n.d.  | 18.75    | 7.75       | 37.44      | 9.568 |       |
| 37     | 9     |       | 19  | 14    | 74    | 14  | 7     | 50    | 22  | 11    | 50    | 10  | 4     | 40    | 13   | 3     | 23    | 11   | 1     | 9     | 11   | 2     | 18    | 9    | 3     | 33    | 13.63    | 5.63       | 37.17      | 7.359 |       |
| 36     | 10    |       | 14  | 3     | 21    | 13  | 5     | 38    | 14  | 5     | 36    | 17  | 2     | 12    | 8    | 5     | 63    | 23   | 4     | 17    | 18   | 8     | 44    | 21   | 10    | 48    | 16.00    | 5.25       | 34.92      | 6.052 |       |
| 38     | 10    |       | 12  | 1     | 8     | 3   | 0     | 5     | 0   | 0     | 7     | 1   | 1     | 14    | 4    | 0     | 5     | 0    | 0     | 0     | 0    | 1     | 0     | 0    | 7     | 2     | 29       | 5.50       | 0.50       | 6.40  | 3.689 |
| 27     | 10    |       | 28  | 14    | 50    | 25  | 18    | 72    | 22  | 10    | 45    | 29  | 16    | 55    | 29   | 14    | 48    | 19   | 11    | 58    | 18   | 12    | 67    | 22   | 7     | 32    | 24.00    | 12.75      | 53.41      | 4.456 |       |
| 33     | 10    |       | 15  | 5     | 33    | 26  | 9     | 35    | 9   | 6     | 67    | 21  | 4     | 19    | 20   | 10    | 50    | 15   | 8     | 53    | 18   | 11    | 61    | 20   | 2     | 10    | 18.00    | 6.88       | 41.01      | 7.120 |       |
| 44     | 10    |       | 6   | 2     | 33    | 7   | 2     | 29    | 13  | 5     | 38    | 9   | 7     | 78    | 19   | 5     | 26    | 6    | 1     | 17    | 14   | 6     | 43    | 16   | 4     | 25    | 11.25    | 4.00       | 36.12      | 6.613 |       |
| 40     | 10    |       | 20  | 8     | 40    | 20  | 12    | 60    | 30  | 12    | 40    | 24  | 12    | 50    | 25   | 8     | 32    | 24   | 13    | 54    | 11   | 6     | 55    | 18   | 11    | 61    | 21.50    | 10.25      | 48.98      | 3.725 |       |
| 42     | 10    |       | 18  | 6     | 33    | 31  | 20    | 65    | 13  | 9     | 69    | 25  | 17    | 68    | 28   | 17    | 61    | 19   | 7     | 37    | 21   | 9     | 43    | 15   | 9     | 60    | 21.25    | 11.75      | 54.44      | 5.113 |       |
| 28     | 10    |       | 15  | 5     | 33    | 9   | 1     | 11    | 14  | 5     | 36    | 9   | 3     | 33    | 13   | 6     | 46    | 22   | 5     | 23    | 8    | 3     | 38    | 15   | 6     | 40    | 13.13    | 4.25       | 32.48      | 3.855 |       |
| 56     | 10    |       | 13  | 7     | 54    | 18  | 6     | 33    | 26  | 10    | 38    | 30  | 19    | 63    | 26   | 16    | 62    | 17   | 8     | 47    | 25   | 7     | 28    | 12   | 7     | 58    | 20.88    | 10.00      | 47.99      | 4.755 |       |
| 40     | 9     |       | 20  | 15    | 75    | 20  | 9     | 45    | 28  | 14    | 50    | 24  | 18    | 75    | 21   | 9     | 43    | 12   | 6     | 50    | 22   | 8     | 36    | 19   | 9     | 47    | 20.75    | 11.00      | 52.70      | 5.107 |       |
| 37     | 10    |       | 19  | 5     | 26    | 19  | 7     | 37    | 14  | 6     | 43    | 18  | 9     | 50    | 29   | 16    | 55    | 20   | 13    | 65    | 14   | 7     | 50    | 21   | 9     | 43    | 19.25    | 9.00       | 46.13      | 4.158 |       |
| 40     | 10    |       | 18  | 10    | 56    | 15  | 6     | 40    | 22  | 3     | 14    | 24  | 8     | 33    | 15   | 9     | 60    | 12   | 5     | 42    | 25   | 12    | 48    | 14   | 6     | 43    | 18.13    | 7.38       | 41.88      | 5.050 |       |
| 36     | 10    |       | 20  | 2     | 10    | 7   | 1     | 14    | 14  | 0     | 0     | 14  | 2     | 14    | 25   | 5     | 20    | 12   | 3     | 25    | 17   | 7     | 41    | 20   | 3     | 15    | 16.13    | 2.88       | 17.47      | 4.252 |       |
| median | 37    | 10    |     |       |       |     |       |       |     |       |       |     |       |       |      |       |       |      |       |       |      |       |       |      |       |       |          | mean ratio | 41.00      | 1.236 |       |
| mean   | 37.64 | 9.88  |     |       |       |     |       |       |     |       |       |     |       |       |      |       |       |      |       |       |      |       |       |      |       |       |          | mean pat   | 17.68      | 0.465 |       |
| number | 25    |       |     |       |       |     |       |       |     |       |       |     |       |       |      |       |       |      |       |       |      |       |       |      |       |       |          | mean b pat | 7.71       | 0.332 |       |

abbreviations: b basal, pat patch, n.d. no data

S1 Table. Patients of the study: diagnosis, age, score and claudin-11 patches, the total number of patches in one tubular cross section (pat) and the number of patches in contact with the basal membrane (b pat).

| Hyp    | age   | score | pat | b pat | ratio | pat | b pat | ratio | pat | b pat | ratio | pat | b pat | ratio | pat  | b pat | ratio | pat  | b pat | ratio | pat  | b pat | ratio | pat  | b pat | ratio | mean pat   | mean b pat | mean ratio | SEM   |
|--------|-------|-------|-----|-------|-------|-----|-------|-------|-----|-------|-------|-----|-------|-------|------|-------|-------|------|-------|-------|------|-------|-------|------|-------|-------|------------|------------|------------|-------|
| 36     | 10    | 18    | 17  | 94    | 12    | 11  | 92    | 26    | 23  | 88    | 23    | 19  | 83    | 12    | 11   | 92    | 15    | 15   | 100   |       |      |       |       |      |       |       | 17.67      | 16.00      | 91.47      | 2.375 |
| 43     | 8     | 12    | 4   | 33    | 30    | 13  | 43    | 16    | 6   | 38    | 13    | 5   | 38    | 15    | 5    | 33    | 25    | 11   | 44    | 15    | 7    | 47    | 21    | 10   | 48    | 18.38 | 7.63       | 40.53      | 2.004      |       |
| 39     | 8     | 9     | 3   | 33    | 7     | 3   | 43    | 7     | 3   | 43    | 11    | 5   | 45    | 11    | 5    | 45    | 17    | 9    | 53    | 13    | 5    | 38    | 1     | 0    | 0     | 9.50  | 4.13       | 37.67      | 5.743      |       |
| 37     | 9     | 17    | 10  | 59    | 18    | 7   | 39    | 9     | 4   | 44    | 17    | 4   | 24    | 18    | 5    | 28    | 17    | 10   | 59    | 17    | 8    | 47    | 29    | 8    | 28    | 17.75 | 7.00       | 40.87      | 4.907      |       |
| 32     | 8     | 22    | 14  | 64    | 26    | 15  | 58    | 12    | 7   | 58    | 10    | 7   | 70    | 14    | 10   | 71    | 14    | 7    | 50    | n.d.  | n.d. | n.d.  | n.d.  | n.d. | n.d.  | 16.33 | 10.00      | 61.85      | 3.324      |       |
| 38     | 8     | 11    | 3   | 27    | 18    | 4   | 22    | 15    | 6   | 40    | 18    | 10  | 56    | n.d.  | n.d. | n.d.  | n.d.  | n.d. | n.d.  | n.d.  | n.d. | n.d.  | n.d.  | n.d. | n.d.  | 15.50 | 5.75       | 36.26      | 7.439      |       |
| 37     | 10    | 16    | 7   | 44    | 27    | 14  | 52    | 18    | 9   | 50    | 20    | 9   | 45    | 24    | 12   | 50    | 17    | 6    | 35    | 22    | 11   | 50    | 26    | 19   | 73    | 21.25 | 10.88      | 49.87      | 3.818      |       |
| 44     | 8     | 20    | 10  | 50    | 16    | 9   | 56    | 15    | 10  | 67    | 25    | 11  | 44    | 17    | 7    | 41    | 20    | 7    | 35    | 7     | 2    | 29    | 22    | 13   | 59    | 17.75 | 8.63       | 47.59      | 4.534      |       |
| 35     | 9     | 26    | 13  | 50    | 25    | 9   | 36    | 27    | 13  | 48    | 17    | 13  | 76    | 24    | 12   | 50    | 31    | 18   | 58    | 18    | 11   | 61    | 36    | 23   | 64    | 25.50 | 14.00      | 55.46      | 4.316      |       |
| 47     | 8     | 18    | 7   | 39    | 13    | 5   | 38    | 23    | 5   | 22    | 21    | 11  | 52    | 18    | 4    | 22    | 11    | 3    | 27    | 12    | 4    | 33    | 6     | 2    | 33    | 15.25 | 5.13       | 33.45      | 3.572      |       |
| 40     | 9     | 25    | 9   | 36    | 16    | 5   | 31    | 17    | 3   | 18    | 22    | 9   | 41    | 20    | 8    | 40    | 14    | 4    | 29    | 14    | 5    | 36    | 13    | 4    | 31    | 17.63 | 5.88       | 32.61      | 2.639      |       |
| 40     | 8     | 14    | 6   | 43    | 14    | 7   | 50    | 11    | 8   | 73    | 26    | 16  | 62    | 24    | 7    | 29    | 18    | 6    | 33    | 17    | 6    | 35    | 14    | 4    | 29    | 17.25 | 7.50       | 44.19      | 5.697      |       |
| 28     | 9     | 22    | 13  | 59    | 15    | 9   | 60    | 23    | 9   | 39    | 9     | 2   | 22    | 18    | 10   | 56    | 16    | 8    | 50    | 11    | 7    | 64    | 15    | 8    | 53    | 16.13 | 8.25       | 50.37      | 4.817      |       |
| 30     | 9     | 11    | 10  | 91    | 12    | 9   | 75    | 15    | 12  | 80    | 10    | 7   | 70    | 11    | 10   | 91    | 18    | 18   | 100   | 16    | 14   | 88    | 20    | 18   | 90    | 14.13 | 12.25      | 85.54      | 3.469      |       |
| 32     | 7     | 18    | 10  | 56    | 17    | 9   | 53    | 18    | 8   | 44    | 29    | 19  | 66    | 22    | 11   | 50    | 26    | 17   | 65    | 18    | 12   | 67    | 28    | 10   | 36    | 22.00 | 12.00      | 54.53      | 3.932      |       |
| 39     | 10    | 14    | 2   | 14    | 13    | 6   | 46    | 14    | 6   | 43    | 23    | 17  | 74    | 22    | 11   | 50    | 5     | 1    | 20    | 16    | 7    | 44    | 5     | 0    | 0     | 14.00 | 6.25       | 36.37      | 8.309      |       |
| 40     | 6     | 16    | 10  | 63    | 24    | 15  | 63    | 18    | 12  | 67    | 16    | 5   | 31    | 16    | 1    | 6     | 21    | 16   | 76    | 18    | 9    | 50    | 22    | 12   | 55    | 18.88 | 10.00      | 51.24      | 7.962      |       |
| 32     | 10    | 6     | 0   | 0     | 6     | 2   | 33    | 10    | 2   | 20    | 5     | 0   | 0     | 9     | 2    | 22    | 6     | 2    | 33    | 6     | 1    | 17    | 5     | 0    | 0     | 6.63  | 1.13       | 15.69      | 5.041      |       |
| 40     | 9     | 6     | 0   | 0     | 10    | 3   | 30    | 12    | 3   | 25    | 10    | 2   | 20    | 15    | 7    | 47    | 16    | 5    | 31    | 11    | 3    | 27    | 19    | 9    | 47    | 12.38 | 4.00       | 28.44      | 5.335      |       |
| 35     | 7     | 26    | 15  | 58    | 20    | 10  | 50    | 21    | 11  | 52    | 26    | 14  | 54    | 10    | 5    | 50    | 24    | 9    | 38    | 26    | 12   | 46    | 18    | 12   | 67    | 21.38 | 11.00      | 51.78      | 2.997      |       |
| 44     | 8     | 24    | 20  | 83    | 27    | 16  | 59    | 13    | 4   | 31    | 23    | 15  | 65    | 13    | 3    | 23    | 18    | 8    | 44    | 22    | 12   | 55    | 22    | 10   | 45    | 20.25 | 11.00      | 50.76      | 6.802      |       |
| 35     | 9     | 22    | 13  | 59    | 23    | 9   | 39    | 25    | 21  | 84    | 28    | 22  | 79    | 26    | 16   | 62    | 23    | 8    | 35    | 30    | 13   | 43    | 22    | 10   | 45    | 24.88 | 14.00      | 55.74      | 6.464      |       |
| 26     | 9     | 25    | 16  | 64    | 16    | 7   | 44    | 24    | 9   | 38    | 26    | 12  | 46    | 21    | 9    | 43    | 13    | 4    | 31    | 30    | 13   | 43    | 25    | 13   | 52    | 22.50 | 10.38      | 45.05      | 3.482      |       |
| 34     | 10    | 16    | 4   | 25    | 22    | 9   | 41    | 18    | 9   | 50    | 16    | 8   | 50    | 20    | 6    | 30    | 12    | 3    | 25    | 11    | 6    | 55    | 11    | 2    | 18    | 15.75 | 5.88       | 36.70      | 4.913      |       |
| median | 37    | 9     |     |       |       |     |       |       |     |       |       |     |       |       |      |       |       |      |       |       |      |       |       |      |       |       | mean ratio | 47.25      | 1.502      |       |
| mean   | 36.79 | 8.58  |     |       |       |     |       |       |     |       |       |     |       |       |      |       |       |      |       |       |      |       |       |      |       |       | mean pat   | 17.49      | 0.473      |       |
| number | 24    |       |     |       |       |     |       |       |     |       |       |     |       |       |      |       |       |      |       |       |      |       |       |      |       |       | mean b pat | 8.66       | 0.370      |       |

abbreviations: b basal, pat patch, n.d. no data

S1 Table. Patients of the study: diagnosis, age, score and claudin-11 patches, the total number of patches in one tubular cross section (pat) and the number of patches in contact with the basal membrane (b pat).

| MA     | age   | score | pat | b pat | ratio | pat | b pat | ratio | pat | b pat | ratio | pat | b pat | ratio | pat  | b pat | ratio | pat  | b pat | ratio | pat  | b pat | ratio | pat  | b pat | ratio | mean pat | mean b pat | mean ratio | SEM   |
|--------|-------|-------|-----|-------|-------|-----|-------|-------|-----|-------|-------|-----|-------|-------|------|-------|-------|------|-------|-------|------|-------|-------|------|-------|-------|----------|------------|------------|-------|
| 30     | 0     | 16    | 7   | 44    | 20    | 11  | 55    | 22    | 10  | 45    | 12    | 5   | 42    | 4     | 1    | 25    | 11    | 5    | 45    | 23    | 15   | 65    | 22    | 13   | 59    | 16.25 | 8.38     | 47.58      | 4.365      |       |
| 39     | 0     | 19    | 7   | 37    | 17    | 6   | 35    | 13    | 3   | 23    | 13    | 7   | 54    | n.d.  | n.d. | n.d.  | n.d.  | n.d. | n.d.  | n.d.  | n.d. | n.d.  | n.d.  | n.d. | n.d.  | 15.50 | 5.75     | 37.26      | 6.327      |       |
| 29     | 0     | 18    | 7   | 39    | 16    | 4   | 25    | 9     | 1   | 11    | 21    | 5   | 24    | 17    | 8    | 47    | 9     | 4    | 44    | 9     | 3    | 33    | 17    | 8    | 47    | 14.50 | 5.00     | 33.84      | 4.596      |       |
| 32     | 0     | 10    | 3   | 30    | 16    | 12  | 75    | 7     | 3   | 43    | 9     | 4   | 44    | 16    | 8    | 50    | 10    | 5    | 50    | 12    | 5    | 42    | 11    | 4    | 36    | 11.38 | 5.50     | 46.29      | 4.729      |       |
| n.d.   | 0     | 15    | 10  | 67    | 20    | 12  | 60    | 18    | 7   | 39    | 14    | 6   | 43    | 25    | 13   | 52    | 20    | 11   | 55    | 9     | 4    | 44    | 17    | 11   | 65    | 17.25 | 9.25     | 53.07      | 3.667      |       |
| 30     | 0     | 19    | 9   | 47    | 19    | 18  | 95    | 16    | 5   | 31    | 16    | 9   | 56    | 25    | 17   | 68    | 23    | 8    | 35    | 9     | 3    | 33    | 19    | 9    | 47    | 18.25 | 9.75     | 51.64      | 7.580      |       |
| 33     | 0     | 10    | 4   | 40    | 18    | 8   | 44    | 18    | 6   | 33    | 11    | 9   | 82    | 24    | 12   | 50    | 16    | 6    | 38    | 18    | 7    | 39    | 12    | 6    | 50    | 15.88 | 7.25     | 47.00      | 5.393      |       |
| 32     | 0     | 6     | 1   | 17    | 6     | 3   | 50    | 7     | 4   | 57    | 8     | 3   | 38    | 10    | 2    | 20    | 10    | 3    | 30    | 14    | 11   | 79    | 9     | 4    | 44    | 8.75  | 3.88     | 41.79      | 7.229      |       |
| 22     | 0     | 20    | 14  | 70    | 10    | 2   | 20    | 12    | 5   | 42    | 21    | 14  | 67    | 15    | 14   | 93    | 9     | 5    | 56    | 13    | 8    | 62    | 20    | 13   | 65    | 15.00 | 9.38     | 59.22      | 7.599      |       |
| 38     | 0     | 4     | 0   | 0     | 10    | 4   | 40    | 12    | 5   | 42    | 15    | 4   | 27    | 9     | 5    | 56    | 13    | 8    | 62    | 15    | 8    | 53    | 16    | 8    | 50    | 11.75 | 5.25     | 41.10      | 7.014      |       |
| 32     | 0     | 17    | 12  | 71    | 13    | 7   | 54    | 11    | 7   | 64    | 11    | 4   | 36    | 12    | 4    | 33    | 5     | 1    | 20    | 6     | 4    | 67    | 8     | 3    | 38    | 10.38 | 5.25     | 47.74      | 6.521      |       |
| 17     | 0     | 21    | 12  | 57    | 25    | 16  | 64    | 22    | 11  | 50    | 30    | 16  | 53    | 13    | 10   | 77    | 22    | 9    | 41    | 19    | 13   | 68    | 12    | 7    | 58    | 20.50 | 11.75    | 58.63      | 3.960      |       |
| 47     | 0     | 25    | 15  | 60    | 23    | 20  | 87    | 25    | 22  | 88    | 15    | 6   | 40    | 13    | 8    | 62    | 13    | 8    | 62    | 9     | 6    | 67    | 24    | 18   | 75    | 18.38 | 12.88    | 67.46      | 5.573      |       |
| 36     | 0     | 20    | 9   | 45    | 21    | 14  | 67    | 20    | 4   | 20    | 21    | 12  | 57    | 13    | 5    | 38    | 17    | 12   | 71    | 13    | 10   | 77    | 24    | 18   | 75    | 18.63 | 10.50    | 56.22      | 7.135      |       |
| 31     | 0     | 21    | 12  | 57    | 10    | 6   | 60    | 19    | 10  | 53    | 17    | 9   | 53    | 17    | 14   | 82    | 12    | 4    | 33    | 8     | 6    | 75    | 15    | 9    | 60    | 14.88 | 8.75     | 59.18      | 5.248      |       |
| 29     | 0     | 22    | 12  | 55    | 24    | 15  | 63    | 8     | 5   | 63    | 9     | 3   | 33    | 15    | 5    | 33    | n.d.  | n.d. | n.d.  | n.d.  | n.d. | n.d.  | n.d.  | n.d. | n.d.  | 15.60 | 8.00     | 49.24      | 6.655      |       |
| 31     | 0     | 13    | 6   | 46    | 13    | 7   | 54    | 13    | 5   | 38    | 14    | 9   | 64    | 8     | 2    | 25    | 9     | 7    | 78    | 19    | 12   | 63    | 8     | 4    | 50    | 12.13 | 6.50     | 52.34      | 5.814      |       |
| 30     | 0     | 24    | 14  | 58    | 21    | 15  | 71    | 5     | 2   | 40    | 17    | 10  | 59    | 14    | 5    | 36    | 17    | 7    | 41    | 13    | 2    | 15    | 17    | 5    | 29    | 16.00 | 7.50     | 43.78      | 6.411      |       |
| 30     | 0     | 20    | 10  | 50    | 23    | 17  | 74    | 20    | 11  | 55    | 25    | 13  | 52    | 15    | 8    | 53    | 17    | 8    | 47    | 20    | 10   | 50    | 18    | 7    | 39    | 19.75 | 10.50    | 52.52      | 3.518      |       |
| 44     | 0     | 13    | 9   | 69    | 22    | 12  | 55    | 31    | 18  | 58    | 19    | 8   | 42    | 21    | 10   | 48    | 34    | 19   | 56    | 24    | 11   | 46    | 11    | 6    | 55    | 21.88 | 11.63    | 53.48      | 2.986      |       |
| 34     | 0     | 40    | 25  | 63    | 31    | 14  | 45    | 28    | 17  | 61    | 34    | 21  | 62    | 34    | 24   | 71    | 36    | 27   | 75    | 44    | 31   | 70    | 29    | 26   | 90    | 34.50 | 23.13    | 66.98      | 4.563      |       |
| 32     | 0     | 23    | 14  | 61    | 25    | 16  | 64    | 21    | 13  | 62    | 26    | 11  | 42    | 32    | 23   | 72    | 19    | 11   | 58    | 17    | 10   | 59    | 14    | 7    | 50    | 22.13 | 13.13    | 58.46      | 3.166      |       |
| 31     | 0     | 18    | 12  | 67    | 20    | 9   | 45    | 16    | 11  | 69    | 28    | 24  | 86    | 32    | 24   | 75    | 19    | 8    | 42    | 19    | 11   | 58    | 21    | 7    | 33    | 21.63 | 13.25    | 59.31      | 6.359      |       |
| 26     | 0     | 14    | 7   | 50    | 13    | 10  | 77    | 18    | 10  | 56    | 23    | 7   | 30    | 15    | 10   | 67    | 21    | 8    | 38    | 8     | 3    | 38    | 11    | 3    | 27    | 15.38 | 7.25     | 47.81      | 6.257      |       |
| 35     | 0     | 22    | 15  | 68    | 31    | 19  | 61    | 19    | 6   | 32    | 18    | 7   | 39    | 21    | 12   | 57    | 19    | 11   | 58    | 20    | 8    | 40    | 22    | 12   | 55    | 21.50 | 11.25    | 51.19      | 4.519      |       |
| median | 32    | 0     |     |       |       |     |       |       |     |       |       |     |       |       |      |       |       |      |       |       |      |       |       |      |       |       |          | mean ratio | 51.33      | 1.208 |
| mean   | 32.08 | 0.00  |     |       |       |     |       |       |     |       |       |     |       |       |      |       |       |      |       |       |      |       |       |      |       |       |          | mean pat   | 17.17      | 0.504 |
| number | 24    |       |     |       |       |     |       |       |     |       |       |     |       |       |      |       |       |      |       |       |      |       |       |      |       |       |          | mean b pat | 9.32       | 0.403 |

abbreviations: b basal, pat patch, n.d. no data

S1 Table. Patients of the study: diagnosis, age, score and claudin-11 patches, the total number of patches in one tubular cross section (pat) and the number of patches in contact with the basal membrane (b pat).

| SCO    | age   | score | pat | b pat | ratio | pat | b pat | ratio | pat  | b pat | ratio | pat  | b pat | ratio | pat  | b pat | ratio | pat  | b pat | ratio | pat  | b pat | ratio | pat  | b pat | ratio | mean pat | mean b pat | mean ratio | SEM   |
|--------|-------|-------|-----|-------|-------|-----|-------|-------|------|-------|-------|------|-------|-------|------|-------|-------|------|-------|-------|------|-------|-------|------|-------|-------|----------|------------|------------|-------|
| 38     | 0     | 34    | 32  | 94    | 8     | 7   | 88    | 24    | 22   | 92    |       |      |       |       |      |       |       |      |       |       |      |       |       |      |       | 22.00 | 20.33    | 91.09      | 1.932      |       |
| 31     | 0     | 31    | 30  | 97    | 28    | 28  | 100   | 18    | 18   | 100   | 19    | 18   | 95    | 30    | 28   | 93    | 20    | 19   | 95    | 25    | 25   | 100   | 21    | 18   | 86    | 24.00 | 23.00    | 95.69      | 1.708      |       |
| 23     | 0     | 17    | 16  | 94    | 20    | 20  | 100   | 15    | 13   | 87    | 19    | 14   | 74    | 8     | 6    | 75    | 12    | 11   | 92    | 12    | 9    | 75    | 27    | 26   | 96    | 16.25 | 14.38    | 86.55      | 3.760      |       |
| 21     | 0     | 24    | 17  | 71    | 34    | 26  | 76    | 23    | 18   | 78    | 18    | 11   | 61    | 25    | 22   | 88    | 35    | 27   | 77    | 28    | 23   | 82    | 44    | 42   | 95    | 28.88 | 23.25    | 78.68      | 3.679      |       |
| 39     | 0     | 36    | 31  | 86    | 23    | 18  | 78    | 31    | 29   | 94    | 27    | 27   | 100   | 26    | 25   | 96    | 24    | 22   | 92    | n.d.  | n.d. | n.d.  | n.d.  | n.d. | n.d.  | 27.83 | 25.33    | 90.96      | 3.166      |       |
| 39     | 0     | 20    | 18  | 90    | 29    | 25  | 86    | 18    | 15   | 83    | 21    | 15   | 71    | 19    | 15   | 79    | 26    | 19   | 73    | 25    | 21   | 84    | 23    | 15   | 65    | 22.63 | 17.88    | 79.03      | 2.985      |       |
| 42     | 0     | 28    | 27  | 96    | 25    | 22  | 88    | 27    | 26   | 96    | 18    | 17   | 94    | n.d.  | n.d. | n.d.  | n.d.  | n.d. | n.d.  | n.d.  | n.d. | n.d.  | n.d.  | n.d. | n.d.  | 24.50 | 23.00    | 93.79      | 1.983      |       |
| 36     | 0     | 27    | 25  | 93    | 24    | 21  | 88    | 30    | 28   | 93    | 22    | 20   | 91    | 26    | 23   | 88    | n.d.  | n.d. | n.d.  | n.d.  | n.d. | n.d.  | n.d.  | n.d. | n.d.  | 25.80 | 23.40    | 90.56      | 1.134      |       |
| 36     | 0     | 13    | 4   | 31    | 21    | 7   | 33    | 14    | 2    | 14    | 18    | 7    | 39    | 20    | 3    | 15    | 19    | 7    | 37    | 17    | 5    | 29    | 25    | 8    | 32    | 18.38 | 5.38     | 28.82      | 3.280      |       |
| 30     | 0     | 40    | 39  | 98    | 25    | 19  | 76    | n.d.  | n.d. | n.d.  | n.d.  | n.d. | n.d.  | n.d.  | n.d. | n.d.  | n.d.  | n.d. | n.d.  | n.d.  | n.d. | n.d.  | n.d.  | n.d. | n.d.  | 32.50 | 29.00    | 86.75      | 10.750     |       |
| 40     | 0     | 30    | 29  | 97    | 37    | 32  | 86    | 27    | 25   | 93    | 27    | 26   | 96    | 38    | 38   | 100   | 32    | 31   | 97    | n.d.  | n.d. | n.d.  | n.d.  | n.d. | n.d.  | 31.83 | 30.17    | 94.82      | 1.924      |       |
| 30     | 0     | 24    | 22  | 92    | 27    | 25  | 93    | 24    | 21   | 88    | 27    | 26   | 96    | n.d.  | n.d. | n.d.  | n.d.  | n.d. | n.d.  | n.d.  | n.d. | n.d.  | n.d.  | n.d. | n.d.  | 25.50 | 23.50    | 92.01      | 1.807      |       |
| 33     | 0     | 39    | 35  | 90    | 23    | 20  | 87    | 32    | 25   | 78    | 30    | 26   | 87    | 20    | 19   | 95    | n.d.  | n.d. | n.d.  | n.d.  | n.d. | n.d.  | n.d.  | n.d. | n.d.  | 28.80 | 25.00    | 87.30      | 2.738      |       |
| 36     | 0     | 31    | 26  | 84    | 29    | 27  | 93    | 28    | 27   | 96    | 27    | 23   | 85    | n.d.  | n.d. | n.d.  | n.d.  | n.d. | n.d.  | n.d.  | n.d. | n.d.  | n.d.  | n.d. | n.d.  | 28.75 | 25.75    | 89.65      | 3.044      |       |
| 35     | 0     | 30    | 28  | 93    | 22    | 18  | 82    | 32    | 28   | 88    | 31    | 27   | 87    | 16    | 11   | 69    | 14    | 11   | 79    | n.d.  | n.d. | n.d.  | n.d.  | n.d. | n.d.  | 24.17 | 20.50    | 82.84      | 3.501      |       |
| 41     | 0     | 14    | 13  | 93    | 13    | 13  | 100   | n.d.  | n.d. | n.d.  | n.d.  | n.d. | n.d.  | n.d.  | n.d. | n.d.  | n.d.  | n.d. | n.d.  | n.d.  | n.d. | n.d.  | n.d.  | n.d. | n.d.  | 13.50 | 13.00    | 96.43      | 3.571      |       |
| 34     | 0     | 29    | 25  | 86    | 26    | 20  | 77    | n.d.  | n.d. | n.d.  | n.d.  | n.d. | n.d.  | n.d.  | n.d. | n.d.  | n.d.  | n.d. | n.d.  | n.d.  | n.d. | n.d.  | n.d.  | n.d. | n.d.  | 27.50 | 22.50    | 81.56      | 4.642      |       |
| 28     | 0     | 34    | 31  | 91    | 29    | 28  | 97    | n.d.  | n.d. | n.d.  | n.d.  | n.d. | n.d.  | n.d.  | n.d. | n.d.  | n.d.  | n.d. | n.d.  | n.d.  | n.d. | n.d.  | n.d.  | n.d. | n.d.  | 31.50 | 29.50    | 93.86      | 2.688      |       |
| 35     | 0     | 38    | 37  | 97    | 43    | 37  | 86    | 30    | 27   | 90    | 30    | 30   | 100   | 40    | 38   | 95    | 32    | 31   | 97    | 43    | 37   | 86    | 32    | 30   | 94    | 36.00 | 33.38    | 93.14      | 1.857      |       |
| median | 35    | 0     |     |       |       |     |       |       |      |       |       |      |       |       |      |       |       |      |       |       |      |       |       |      |       |       |          | mean ratio | 85.98      | 1.867 |
| mean   | 34.05 | 0.00  |     |       |       |     |       |       |      |       |       |      |       |       |      |       |       |      |       |       |      |       |       |      |       |       |          | mean pat   | 24.62      | 0.770 |
| number | 19    |       |     |       |       |     |       |       |      |       |       |      |       |       |      |       |       |      |       |       |      |       |       |      |       |       |          | mean b pat | 20.19      | 0.883 |

| SGA    | age   | score | pat | b pat | ratio | pat | b pat | ratio | pat  | b pat | ratio | pat  | b pat | ratio | pat  | b pat | ratio | pat  | b pat | ratio | pat  | b pat | ratio | pat  | b pat | ratio | mean pat | mean b pat | mean ratio | SEM   |
|--------|-------|-------|-----|-------|-------|-----|-------|-------|------|-------|-------|------|-------|-------|------|-------|-------|------|-------|-------|------|-------|-------|------|-------|-------|----------|------------|------------|-------|
| 38     | 0     | 18    | 10  | 56    | 24    | 12  | 50    | n.d.  | n.d. | n.d.  | n.d.  | n.d. | n.d.  | n.d.  | n.d. | n.d.  | n.d.  | n.d. | n.d.  | n.d.  | n.d. | n.d.  | n.d.  | n.d. | n.d.  | 21.00 | 11.00    | 52.78      | 2.778      |       |
| 31     | 0     | 12    | 6   | 50    | 12    | 6   | 50    | 11    | 1    | 9     | 8     | 2    | 25    | 12    | 2    | 17    | 21    | 8    | 38    | 18    | 5    | 28    | 23    | 2    | 9     | 14.63 | 4.00     | 28.17      | 5.882      |       |
| 36     | 0     | 17    | 7   | 41    | 16    | 6   | 38    | 19    | 9    | 47    | 20    | 8    | 40    | 30    | 6    | 20    | 15    | 5    | 33    | 13    | 4    | 31    | 28    | 9    | 32    | 19.75 | 6.75     | 35.29      | 2.914      |       |
| 82     | 0     | 21    | 7   | 33    | 21    | 6   | 29    | 18    | 8    | 44    | 13    | 5    | 38    | 17    | 5    | 29    | 13    | 6    | 46    | 23    | 10   | 43    | 17    | 7    | 41    | 17.88 | 6.75     | 38.13      | 2.437      |       |
| 36     | 0     | 21    | 6   | 29    | 37    | 12  | 32    | 18    | 10   | 56    | 21    | 8    | 38    | 17    | 10   | 59    | 30    | 13   | 43    | 19    | 4    | 21    | 23    | 8    | 35    | 23.25 | 8.88     | 39.08      | 4.587      |       |
| 37     | 0     | 24    | 4   | 17    | 11    | 2   | 18    | 34    | 10   | 29    | 25    | 10   | 40    | 26    | 8    | 31    | 28    | 11   | 39    | 20    | 8    | 40    | 12    | 3    | 25    | 22.50 | 7.00     | 29.91      | 3.353      |       |
| 51     | 0     | 10    | 1   | 10    | 25    | 4   | 16    | 28    | 11   | 39    | 29    | 5    | 17    | 14    | 5    | 36    | 8     | 1    | 13    | 15    | 2    | 13    | 22    | 3    | 14    | 18.88 | 4.00     | 19.71      | 3.971      |       |
| 51     | 0     | 15    | 7   | 47    | 8     | 3   | 38    | 9     | 3    | 33    | 14    | 4    | 29    | 7     | 3    | 43    | 17    | 6    | 35    | 16    | 8    | 50    | 16    | 6    | 38    | 12.75 | 5.00     | 38.97      | 2.513      |       |
| median | 38    | 0     |     |       |       |     |       |       |      |       |       |      |       |       |      |       |       |      |       |       |      |       |       |      |       |       |          | mean ratio | 35.25      | 1.658 |
| mean   | 45.25 | 0.00  |     |       |       |     |       |       |      |       |       |      |       |       |      |       |       |      |       |       |      |       |       |      |       |       |          | mean pat   | 18.60      | 0.894 |
| number | 8     |       |     |       |       |     |       |       |      |       |       |      |       |       |      |       |       |      |       |       |      |       |       |      |       |       |          | mean b pat | 6.22       | 0.406 |

abbreviations: b basal, pat patch, n.d. no data
